# Supplementary material for: Salinity Tolerance, Ion Accumulation Potential and Osmotic Adjustment In Vitro and In Planta of Different Armeria maritima Accessions from a Dry Coastal Meadow
Source: Plants (Basel). 2022 Sep 29;11(19):2570. doi: 10.3390/plants11192570 (PMC9571588; doi:10.3390/plants11192570)
Supplement: Supplementary file 1 [file plants-11-02570-s001.zip › plants-1935956-supplementary.pdf]

## Salinity Tolerance, Ion Accumulation Potential and Osmotic Adjustment In Vitro and In Planta of Different *Armeria maritima* Accessions from a Dry Coastal Meadow

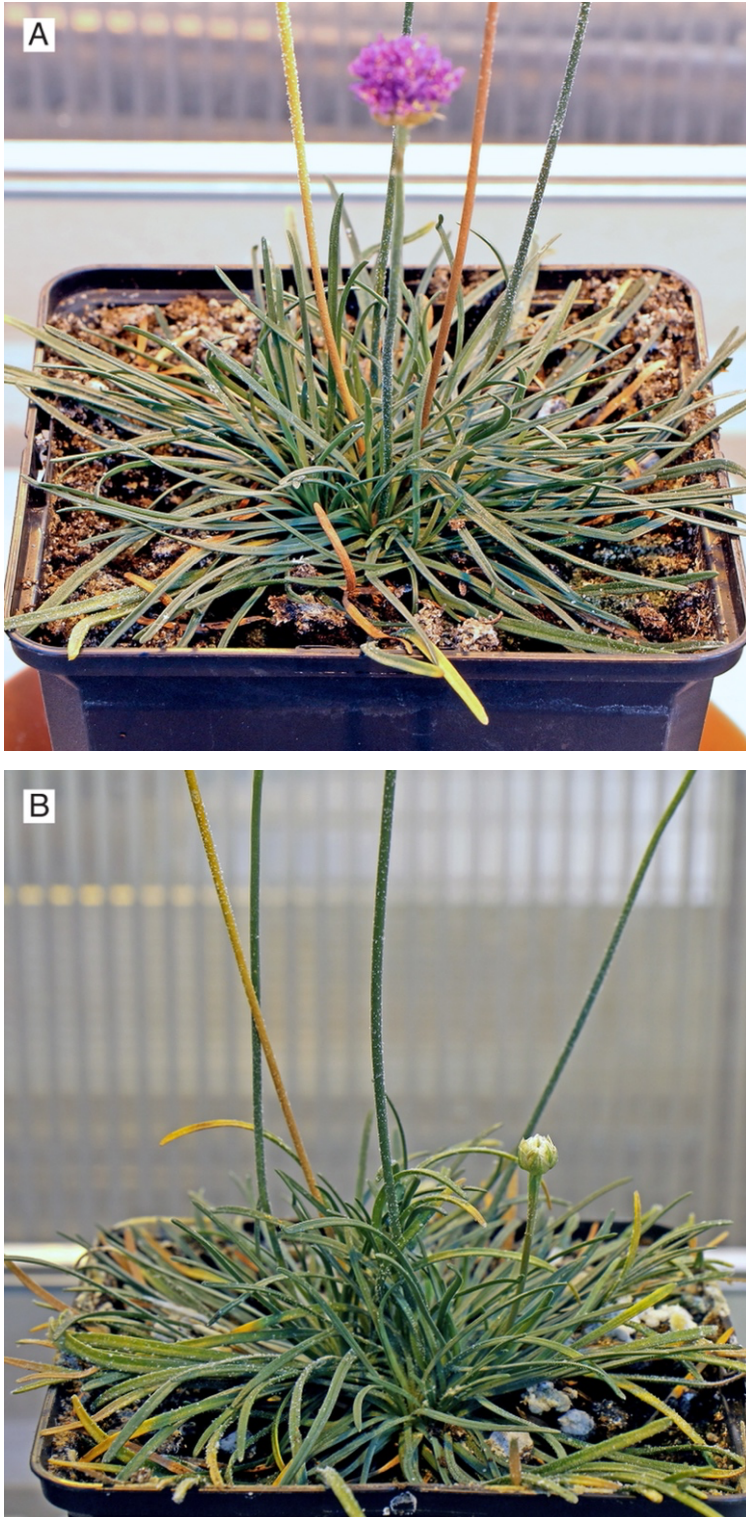

**Figure S1.** Typical *Armeria maritima* (AM2) individuals 6 weeks after full treatment with  $217 \text{ mol L}^{-1}$  NaCl (A) and  $217 \text{ mol L}^{-1}$  KCl (B) showing formation of salt crystals on surface of leaves and flower stems.

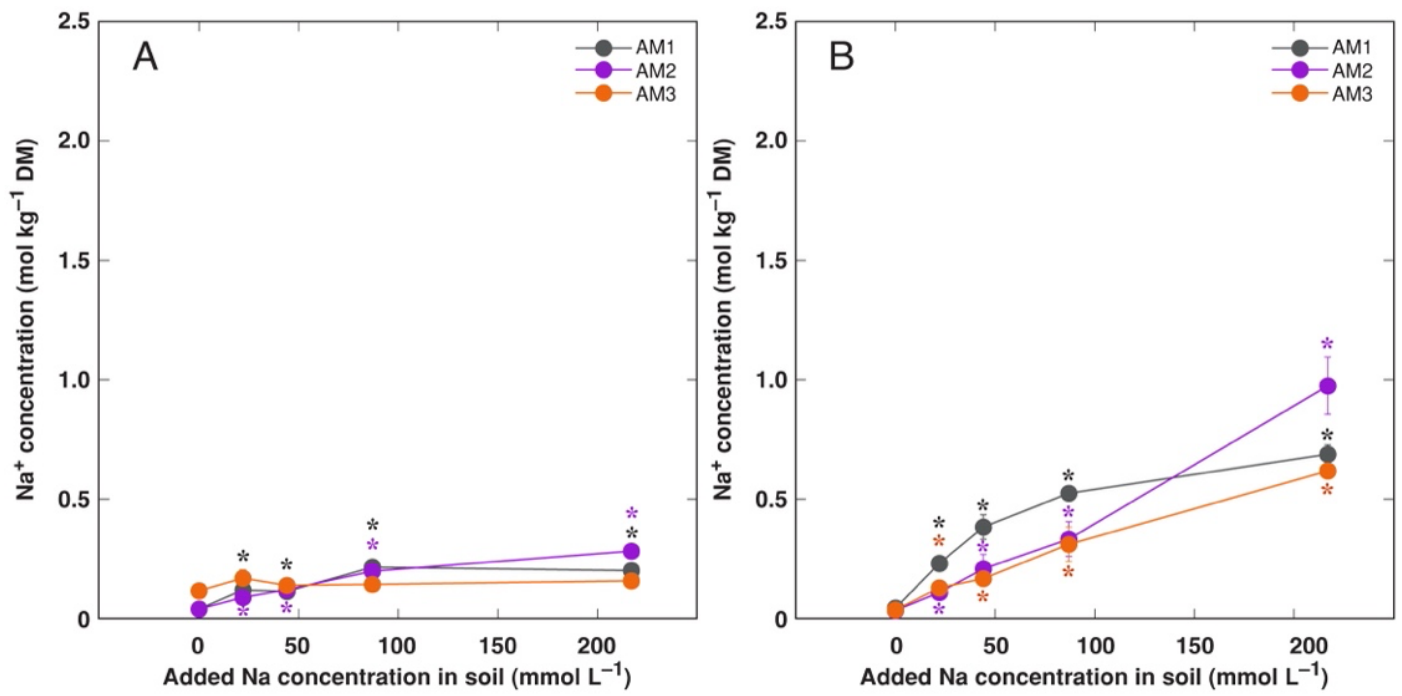

**Figure S2.** Effect of added NaCl concentration in soil on accumulation of Na<sup>+</sup> in roots (A) and flower stalks (B) of *Armeria maritima* plants from different accessions after 7–8 weeks of cultivation. Data are means  $\pm$  SE from 3 replicates. Asterisks of respective color indicate statistically significant differences ( $p < 0.05$ ) from control.

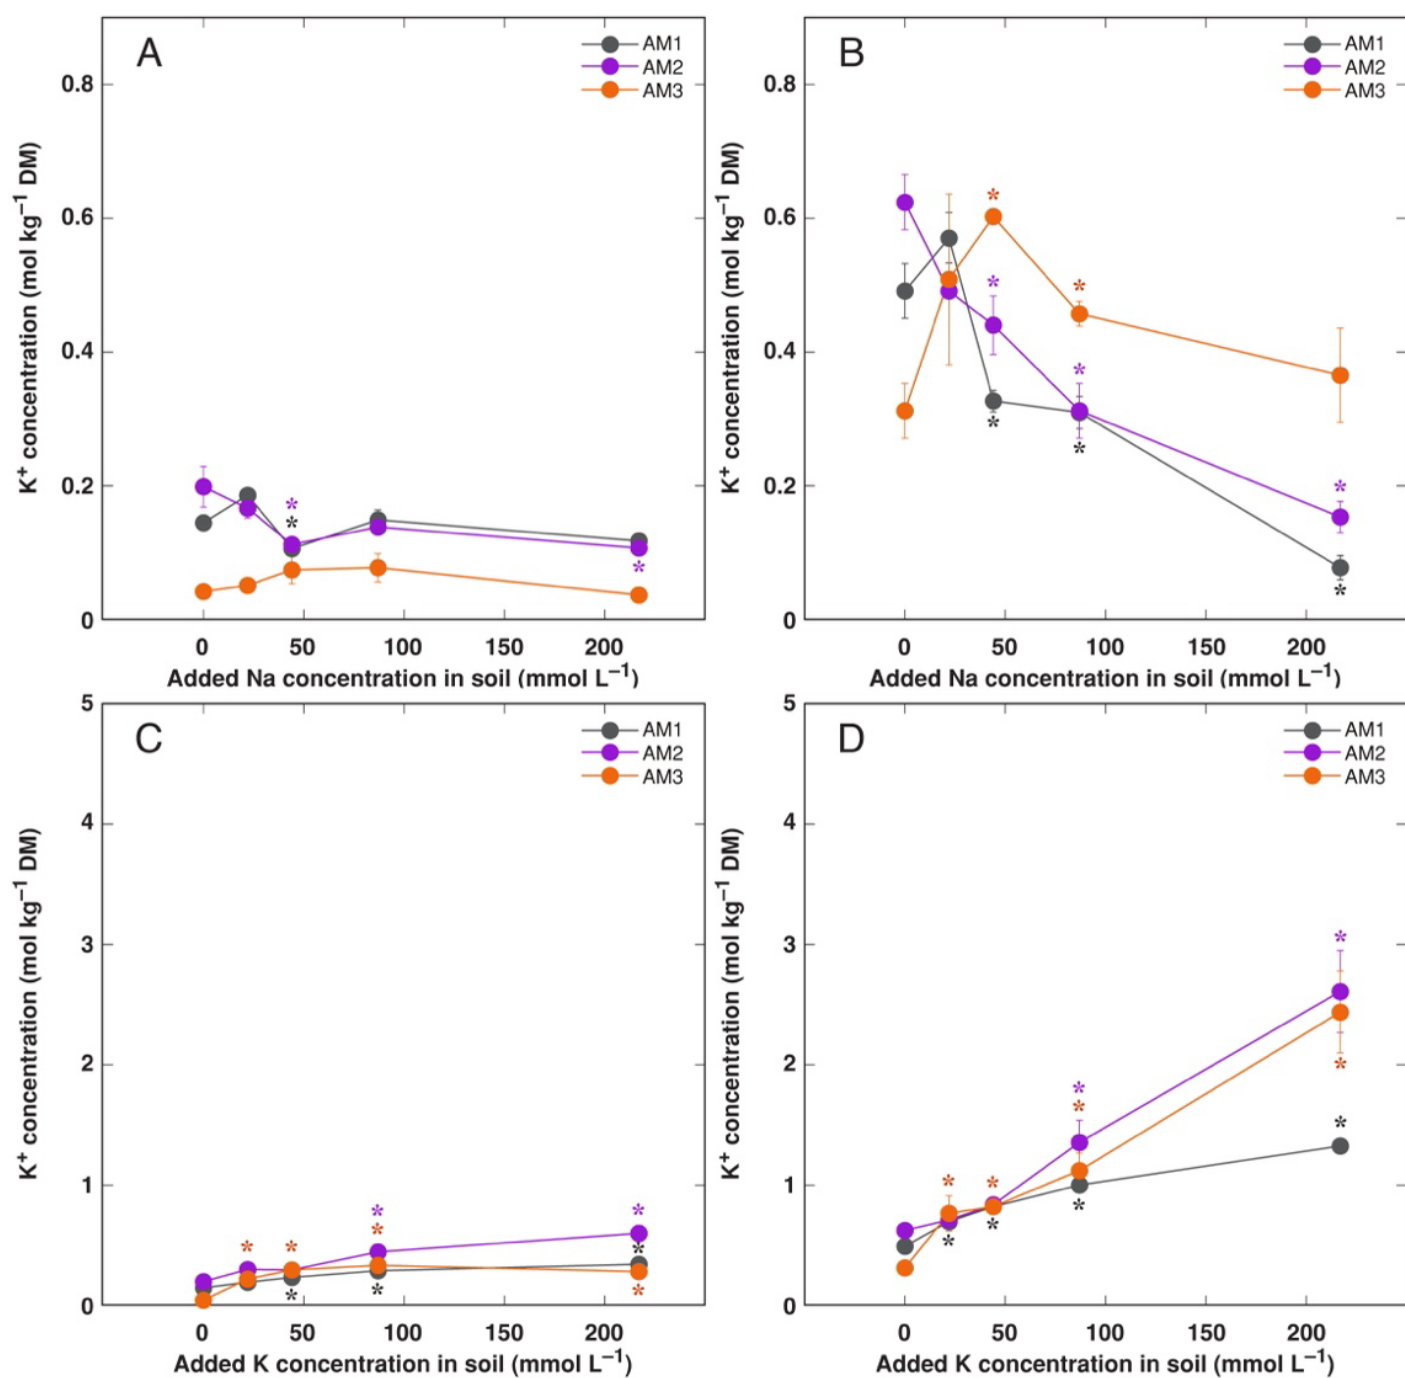

**Figure S3.** Effect of added NaCl (A, B) and KCl (C, D) concentration in soil on accumulation of  $K^+$  in roots (A, C) and flower stalks (B, D) of *Armeria maritima* plants from different accessions after 7–8 weeks of cultivation. Data are means  $\pm$  SE from 3 replicates. Asterisks of respective color indicate statistically significant differences ( $p < 0.05$ ) from control.

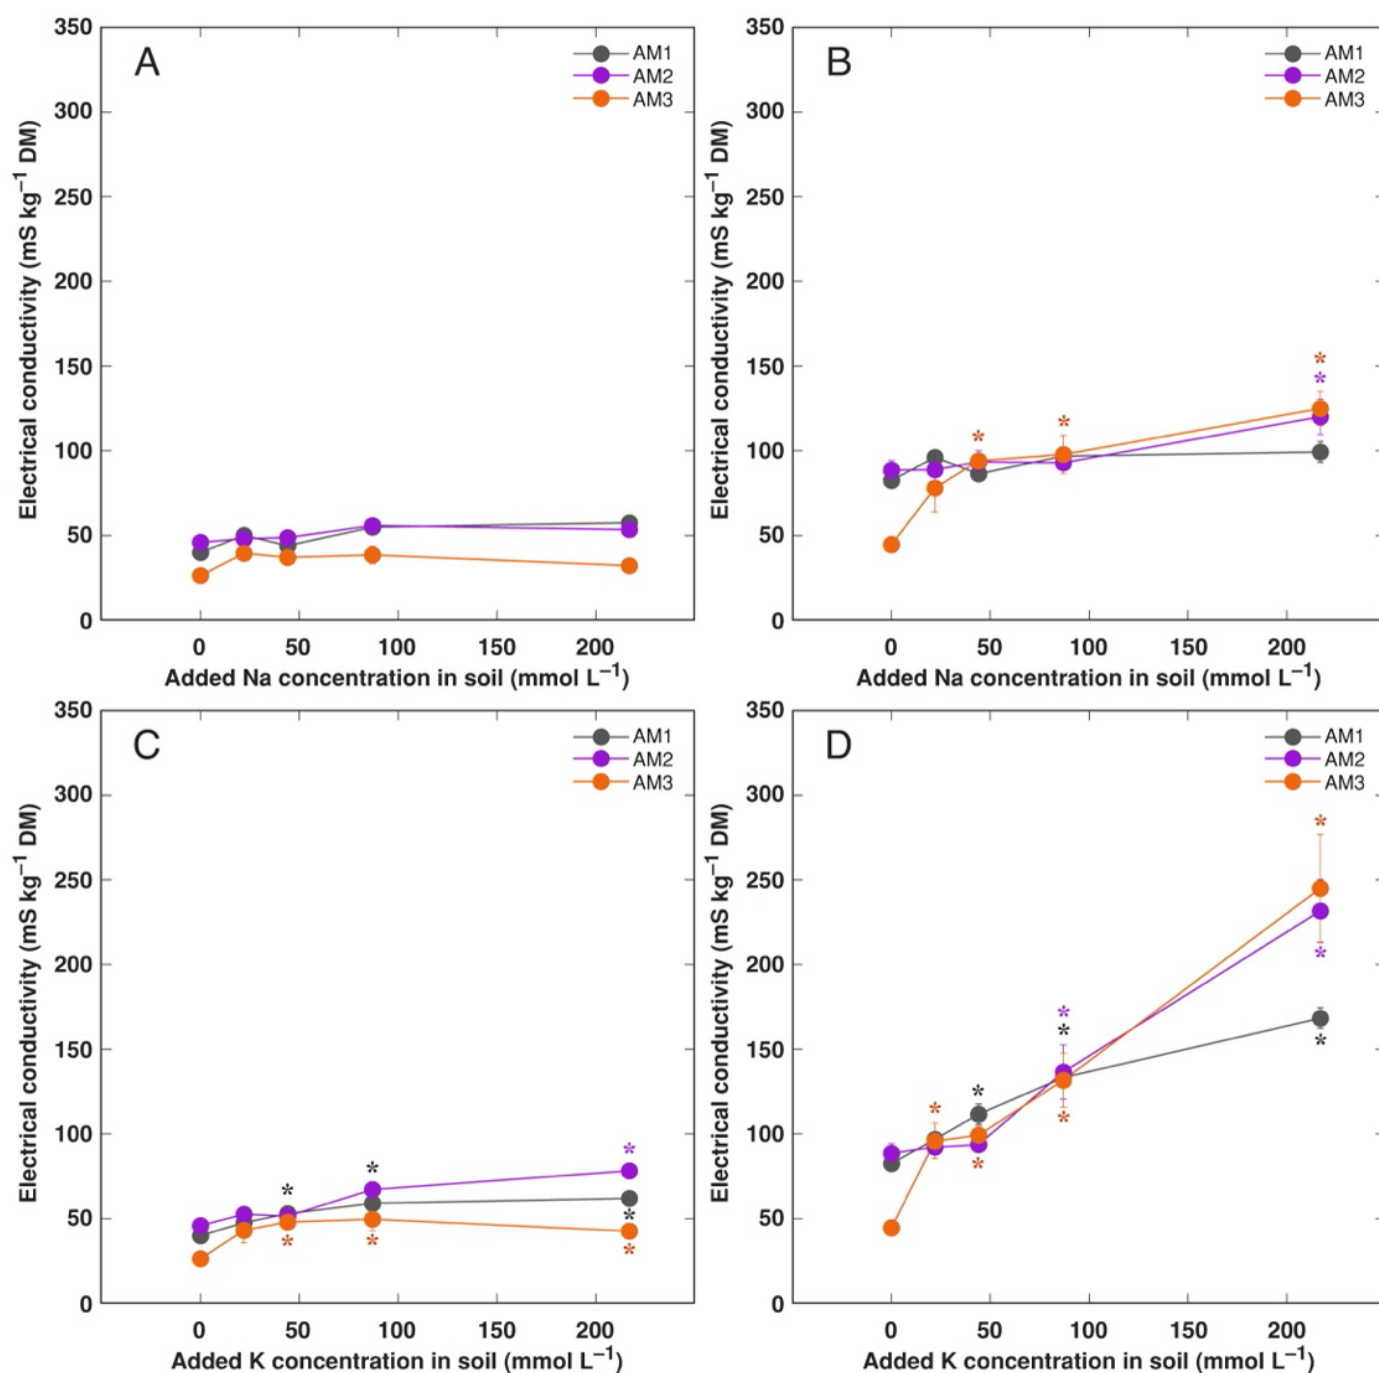

**Figure S4.** Effect of added NaCl (A, B) and KCl (C, D) concentration in soil on electrical conductivity in roots (A, C) and flower stalks (B, D) of *Armeria maritima* plants from different accessions after 7–8 weeks of cultivation. Data are means  $\pm$  SE from 3 replicates. Asterisks of respective color indicate statistically significant differences ( $p < 0.05$ ) from control.

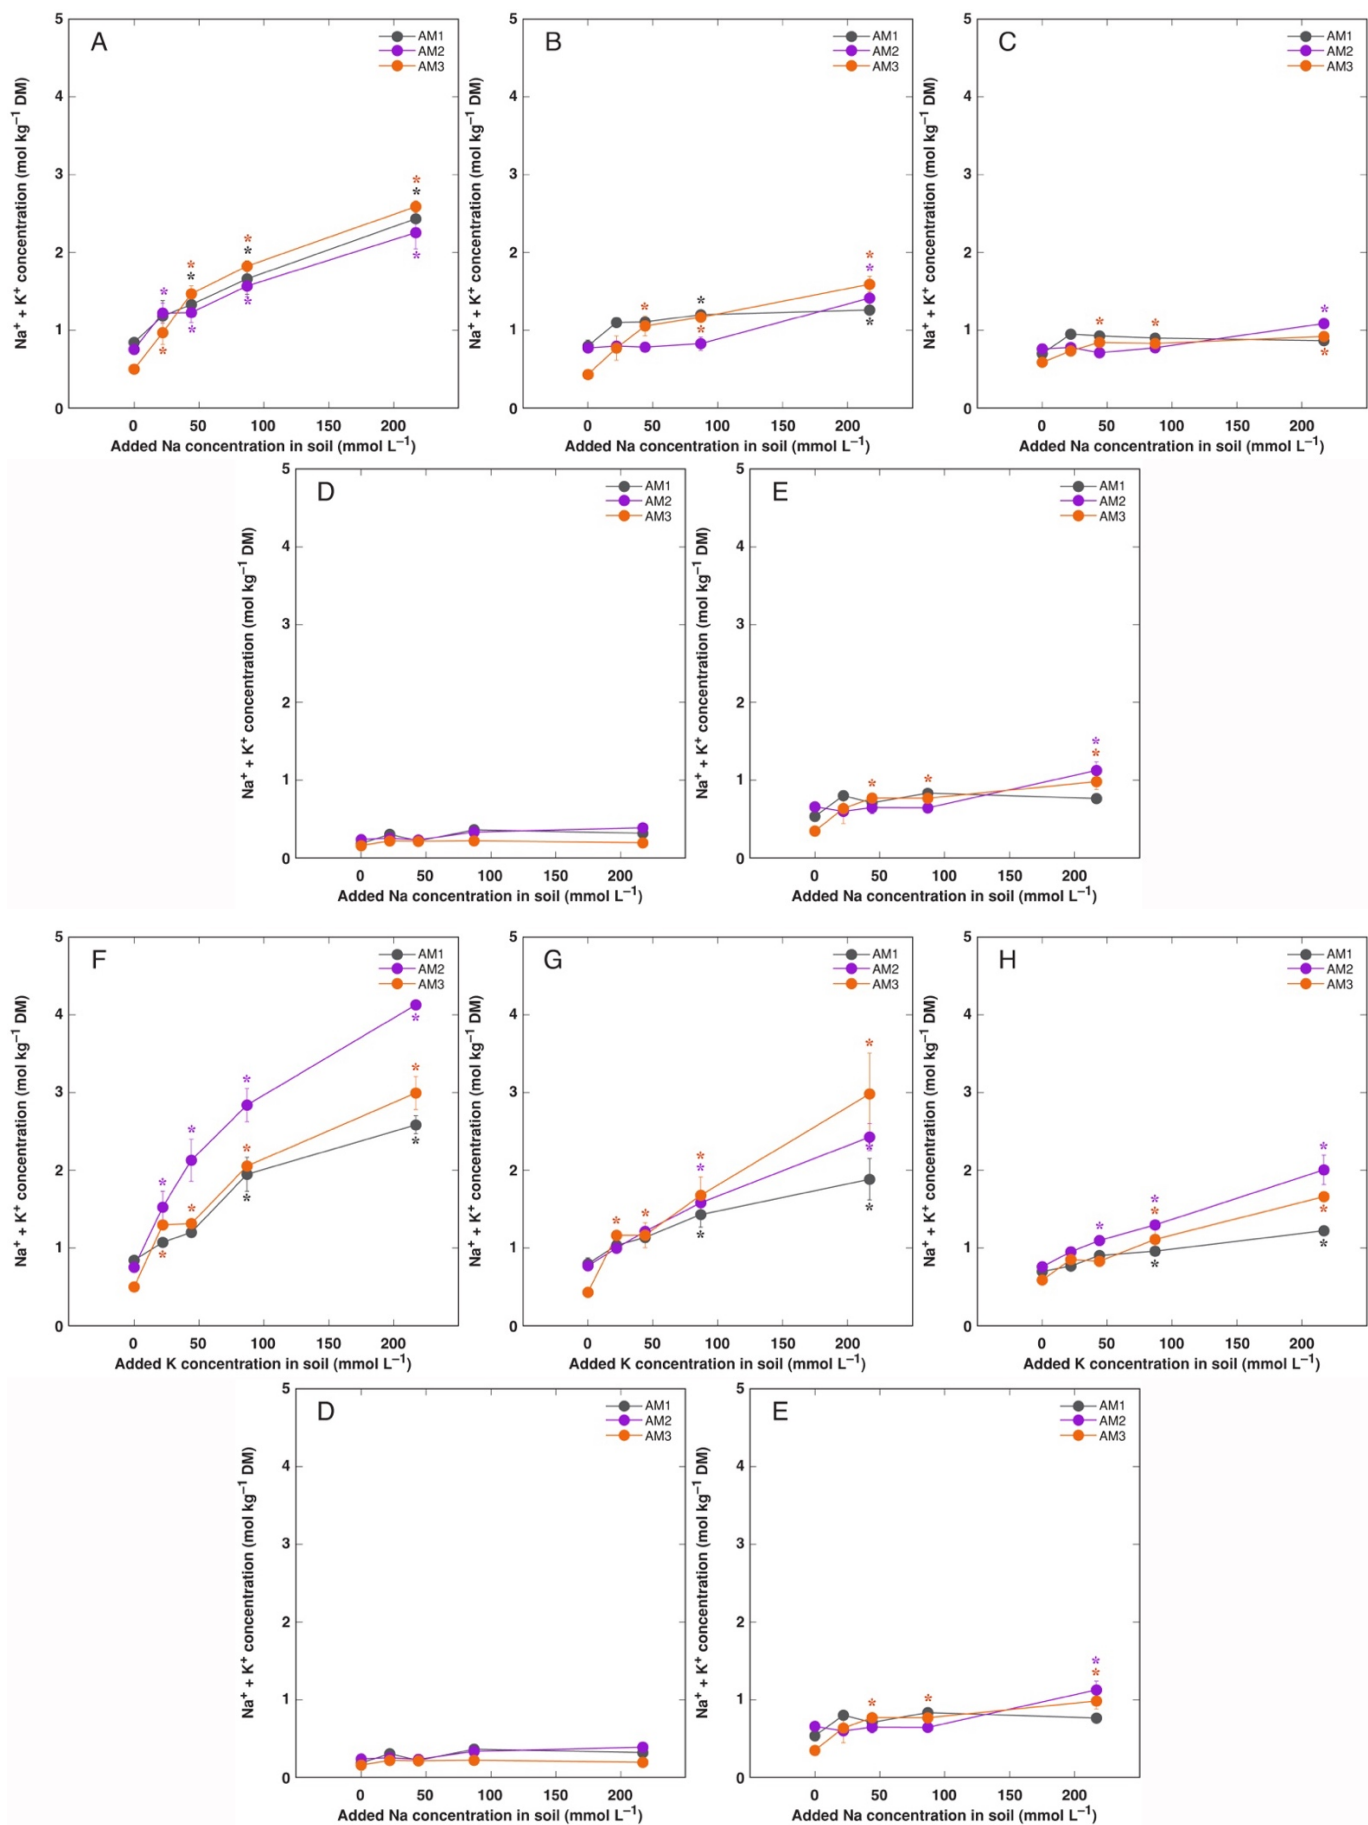

**Figure S5.** Effect of added NaCl (A–E) and KCl (F–J) concentration on summed concentration of  $\text{Na}^+ + \text{K}^+$  in old leaves (A, F), new leaves (B, G), flowers (C, H), roots (D, I) and flower stalks (E, J) of *Armeria maritima* plants from different accessions after 7–8 weeks of cultivation. Data are means  $\pm$  SE from 3 replicates. Asterisks of respective color indicate statistically significant differences ( $p < 0.05$ ) from control.

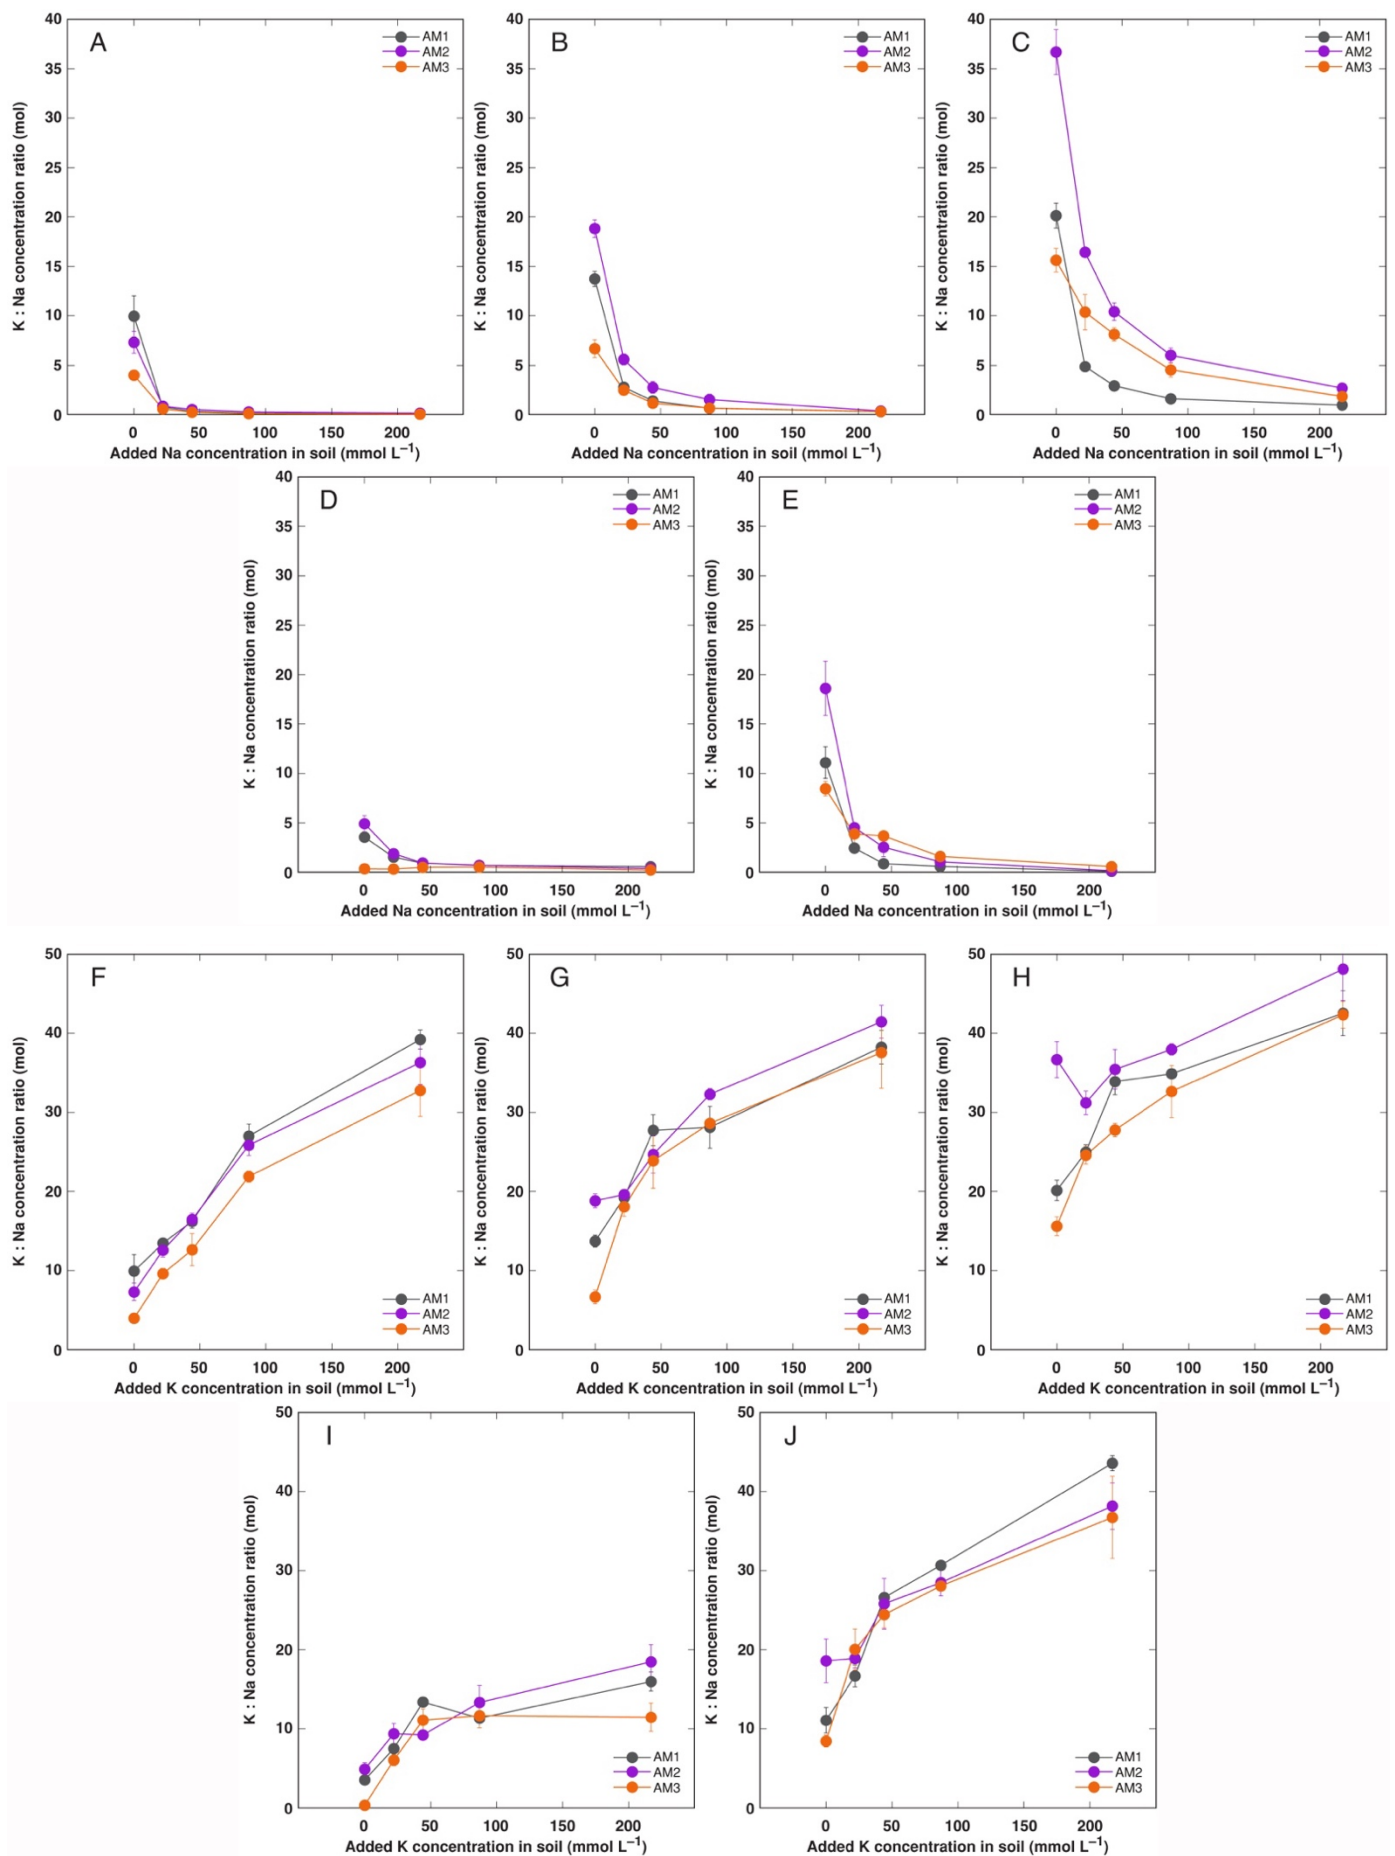

**Figure S6.** Effect of added NaCl (A–E) and KCl (F–J) concentration in K<sup>+</sup> : Na<sup>+</sup> concentration ratio in old leaves (A, F), new leaves (B, G), flowers (C, H), roots (D, I) and flower stalks (E, J) of *Armeria maritima* plants from different accessions after 7–8 weeks of cultivation. Data are means  $\pm$  SE from 3 replicates. Asterisks of respective color indicate statistically significant differences ( $p < 0.05$ ) from control.

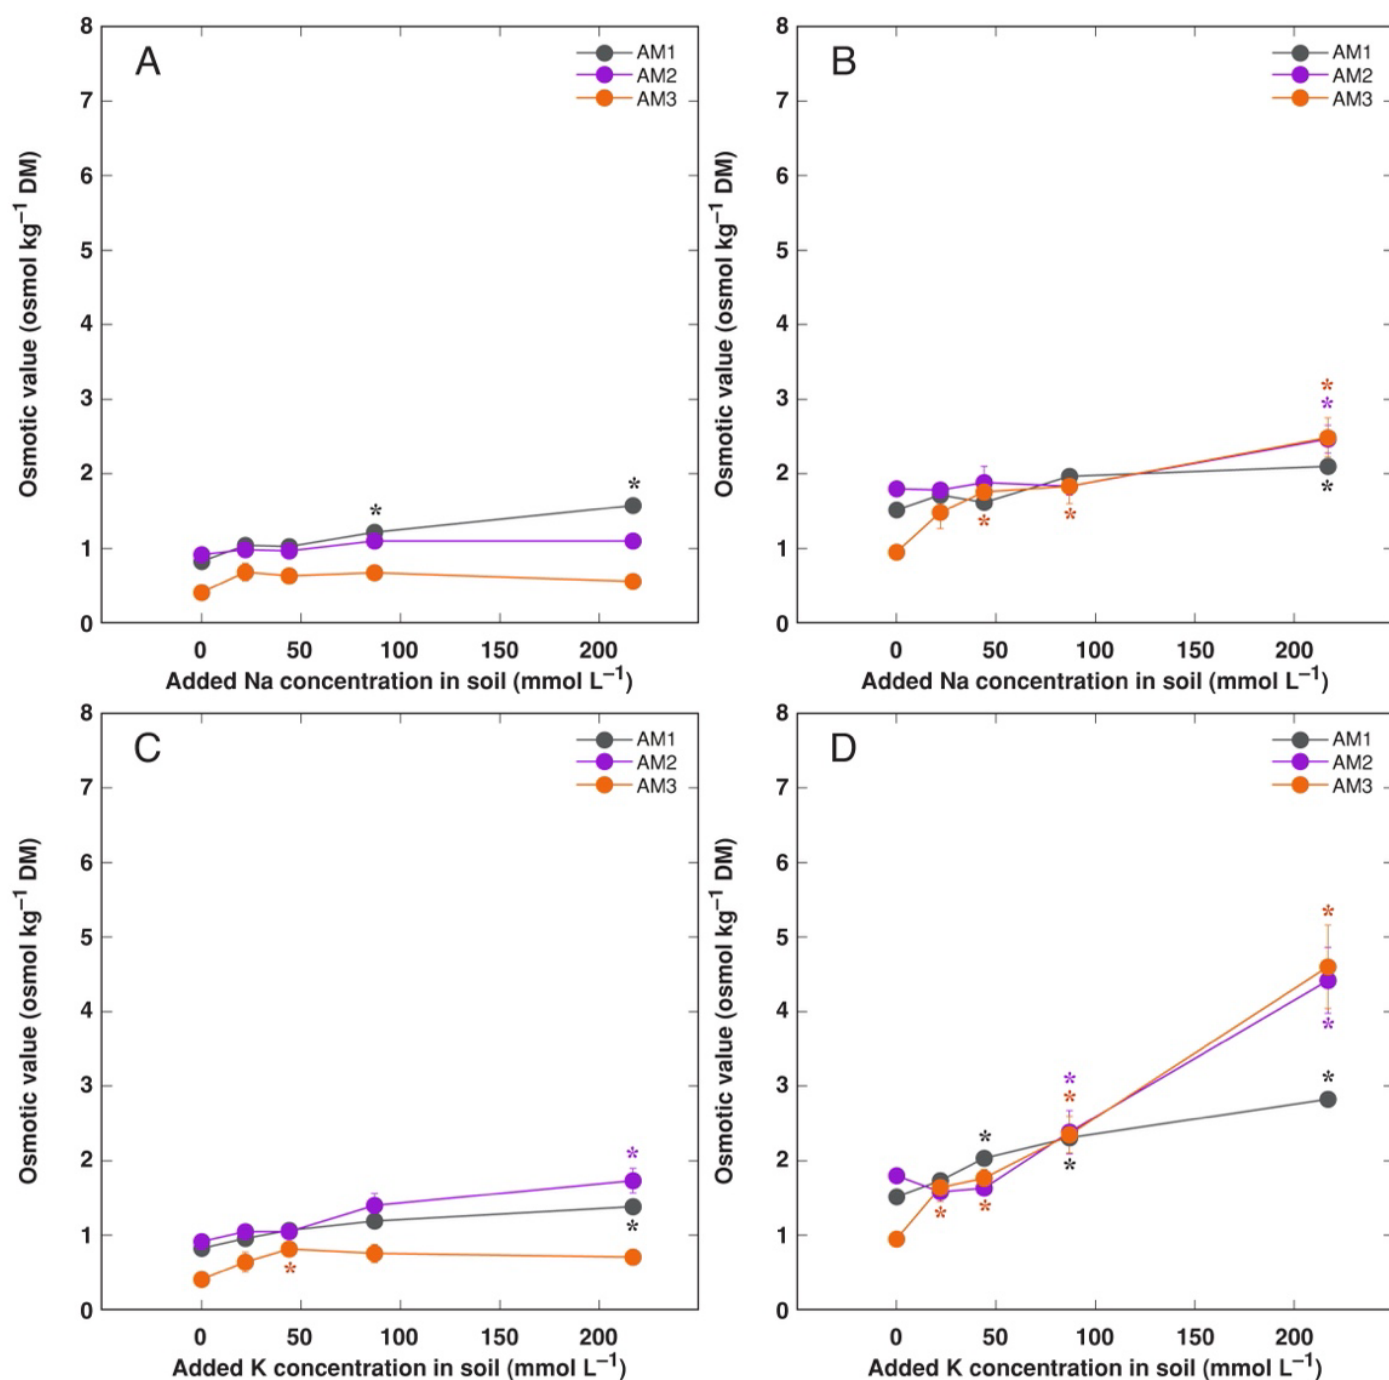

**Figure S7.** Effect of added NaCl (A, B) and KCl (C, D) concentration in soil on osmotic value in roots (A, C) and flower stalks (B, D) of *Armeria maritima* plants from different accessions after 7–8 weeks of cultivation. Data are means  $\pm$  SE from 3 replicates. Asterisks of respective color indicate statistically significant differences ( $p < 0.05$ ) from control.

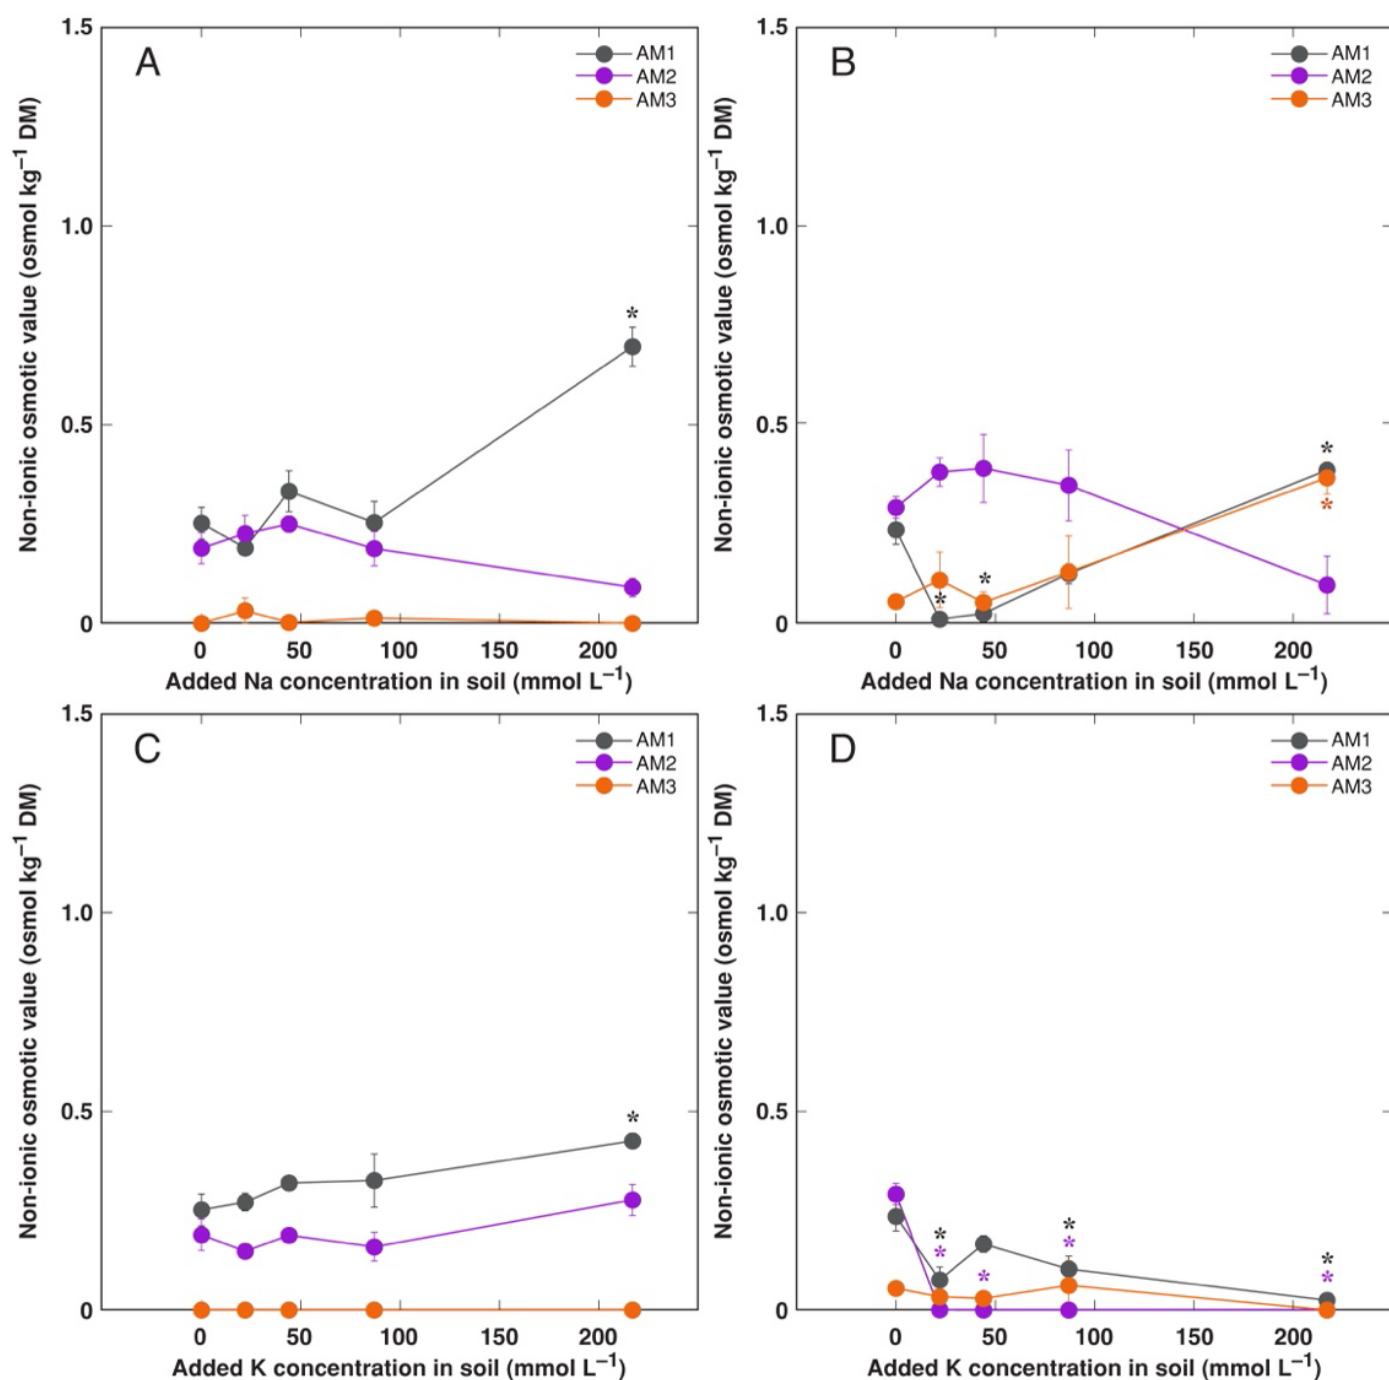

**Figure S8.** Effect of added NaCl (A, B) and KCl (C, D) concentration in soil on non-ionic osmotic value in roots (A, C) and flower stalks (B, D) of *Armeria maritima* plants from different accessions after 7–8 weeks of cultivation. Data are means  $\pm$  SE from 3 replicates. Asterisks of respective color indicate statistically significant differences ( $p < 0.05$ ) from control.
